# Supplementary material for: New Communities on Eucalypts Grown Outside Australia
Source: Front Plant Sci. 2016 Nov 29;7:1812. doi: 10.3389/fpls.2016.01812 (PMC5126142; doi:10.3389/fpls.2016.01812)
Supplement: DATA SHEET 1 — Database of Australian invaders, native colonisers, and their associated natural enemies. [file Data_Sheet_1.XLSX]

## Sheet: Natural enemies
Insect species	Family	Order	Functional group	Region or country of origin	Region or country of record	Associated host or prey
Alcaeorrhynchus grandis	Pentatomidae	Hemiptera	predator	Brazil	Brazil	native caterpillars
Allograpta exotica	Syrphidae	Diptera	predator	Chile	Chile	Ctenarytaina eucalypti
Anacis sp.	Ichneumonidae	Hymenoptera	pupal parasitoid	South America, Australasia	New Zealand	Uraba lugens
Anaphes nitens	Mymaridae	Hymenoptera	egg parasitoid	Australia	Argentina	Gonipterus platensis
Anaphes nitens	Mymaridae	Hymenoptera	egg parasitoid	Australia	Brazil	Gonipterus platensis
Anaphes nitens	Mymaridae	Hymenoptera	egg parasitoid	Australia	France	Gonipterus platensis
Anaphes nitens	Mymaridae	Hymenoptera	egg parasitoid	Australia	Italy	Gonipterus platensis
Anaphes nitens	Mymaridae	Hymenoptera	egg parasitoid	Australia	Kenya	Gonipterus platensis
Anaphes nitens	Mymaridae	Hymenoptera	egg parasitoid	Australia	Madagascar	Gonipterus platensis
Anaphes nitens	Mymaridae	Hymenoptera	egg parasitoid	Australia	Malawi	Gonipterus platensis
Anaphes nitens	Mymaridae	Hymenoptera	egg parasitoid	Australia	South Africa	Gonipterus platensis
Anaphes nitens	Mymaridae	Hymenoptera	egg parasitoid	Australia	Uruguay	Gonipterus platensis
Anaphes nitens	Mymaridae	Hymenoptera	egg parasitoid	Australia	Zimbabwe	Gonipterus platensis
Anaphes nitens	Mymaridae	Hymenoptera	egg parasitoid	Australia	USA	Gonipterus platensis
Anaphes nitens	Mymaridae	Hymenoptera	egg parasitoid	Australia	Chile	Gonipterus platensis
Anaphes nitens	Mymaridae	Hymenoptera	egg parasitoid	Australia	Spain	Gonipterus platensis
Anaphes nitens	Mymaridae	Hymenoptera	egg parasitoid	Australia	New Zealand	Gonipterus platensis
Anaphes nitens	Mymaridae	Hymenoptera	egg parasitoid	Australia	Mauritius	Gonipterus platensis
Anastus sp.	Eupelmidae	Hymenoptera	egg parasitoid	Africa	East Africa	Gonometa podocarpi
Anthocoris nemoralis	Anthocoridae	Hemiptera	predator	Europe	USA	Glycaspis brimblecombei
Anthocoris nemoralis	Anthocoridae	Hemiptera	predator	Palearctic	Turkey	Glycaspis brimblecombei
ants	Formicidae	Hymenoptera	predator	Portugal	Portugal	Glycaspis brimblecombei
ants	Formicidae	Hymenoptera	predator	Spain	Spain	Glycaspis brimblecombei
Aprostocetus causalis	Eulophidae	Hymenoptera	parasitoid	unknown	China, Thailand	Leptocybe invasa
Aprostocetus gala	Eulophidae	Hymenoptera	egg parasitoid	India	India	Leptocybe invasa
Artigasia indigena	Hystrignathidae	Nematoda	parasite	Argentina	Argentina	Phoracantha semipunctata
Ascogaster sp.	Braconidae	Hymenoptera	parasitoid	Asia	Malaysia	Strepsicrates rhothia
Atopozelus opsimus	Reduviidae	Hemiptera	predator	Brazil	Brazil	Thaumastocoris peregrinus
Atopozelus opsimus	Reduviidae	Hemiptera	predator	Brazil	Brazil	Glycaspis brimblecombei
Atrachelus cinereus	Reduviidae	Hemiptera	predator	Argentina	Argentina	Thaumastocoris peregrinus
Avetianella longoi	Encyrtidae	Hymenoptera	egg parasitoid	Australia	Italy	Phoracantha spp.
Avetianella longoi	Encyrtidae	Hymenoptera	egg parasitoid	Australia	South Africa	Phoracantha spp.
Avetianella longoi	Encyrtidae	Hymenoptera	egg parasitoid	Australia	USA	Phoracantha spp.
Avetianella longoi	Encyrtidae	Hymenoptera	egg parasitoid	Australia	Chile	Phoracantha spp.
Baeoanusia albifunicle	Encyrtidae	Hymenoptera	hyperparasitoid	Australia	New Zealand	Enoggera nassaui
Brachymeria conica	Chalcididae	Hymenoptera	pupal parasitoid	Brazil	Brazil	Myonia pyraloides
Brachymeria ovata	Chalcididae	Hymenoptera	pupal parasitoid	America	Brazil	Eupseudosoma spp.
Brachymeria pandora	Chalcididae	Hymenoptera	pupal parasitoid	South America	Brazil	Thyrinteina leucocerae
Bracon phylacteophagus	Braconidae	Hymenoptera	larval parasitoid	Australia	New Zealand	Phylacteophaga froggatti
Brontocoris tabidus	Pentatomidae	Hemiptera	predator	Brazil	Brazil	Podalia walkeri
Brontocoris tabidus	Pentatomidae	Hemiptera	predator	Brazil	Brazil	Euselasia eucerus
brown lacewings	Hemerobiidae	Neuroptera	predator	Colombia	Colombia	Ctenarytaina eucalypti
brown lacewings	Hemerobiidae	Neuroptera	predator	USA	USA	Glycaspis brimblecombei
Camponotus distinguendus	Formicidae	Hymenoptera	predator	Chile	Chile	Ctenarytaina eucalypti
Carrhotus coronatus	not named	Araneae	predator	China	China	Leptocybe invasa
Cermatulus nasalis	Pentatomidae	Coleoptera	predator	New Zealand, Australia	New Zealand	Gonipterus platensis
Chilocorus bipustulatus	Coccinellidae	Coleoptera	predator	USA	USA	Glycaspis brimblecombei
Chrysoperla externa	Chrysopidae	Neuroptera	predator	Brazil	Brazil	Thaumastocoris peregrinus
Cleobora mellyi	Coccinellidae	Coleoptera	predator	Australia	New Zealand	Paropsis charybdis
Cleruchoides noackae	Mymaridae	Hymenoptera	egg parasitoid	Australia	Chile	Thaumastocoris peregrinus
Closterocerus chamaeleon	Eulophidae	Hymenoptera	parasitoid	Australia	Portugal	Ophelimus maskelli
Closterocerus chamaeleon	Eulophidae	Hymenoptera	parasitoid	Australia	USA	Ophelimus maskelli
Closterocerus chamaeleon	Eulophidae	Hymenoptera	parasitoid	Australia	Italy	Ophelimus maskelli
Closterocerus chamaeleon	Eulophidae	Hymenoptera	parasitoid	Australia	Turkey	Ophelimus maskelli
Closterocerus chamaeleon	Eulophidae	Hymenoptera	parasitoid	Australia	Israel	Ophelimus maskelli
Coccidoctonus psyllae	Encyrtidae	Hymenoptera	hyperparasitoid	Australia	New Zealand	Psyllaephagus spp.
Coccinella californica	Coccinellidae	Coleoptera	predator	USA	USA	Glycaspis brimblecombei
Cotesia urabae	Braconidae	Hymenoptera	larval parasitoid	Australia	New Zealand	Uraba lugens
Crematogaster scutellatus	Formicidae	Hymenoptera	omnivores	Europe	Portugal	Phoracantha spp.
Cyrtarachne sp.	not named	Araneae	predator	China	China	Leptocybe invasa
dragonflies	not named	Odonata	predator	USA	USA	Glycaspis brimblecombei
Enoggera nassaui	Pteromalidae	Hymenoptera	egg parasitoid	Australia	New Zealand	Paropsis charybdis
Enoggera reticulata	Pteromalidae	Hymenoptera	egg parasitoid	Australia	South Africa	Trachymela tincticollis
Eriopis connexa	Coccinellidae	Coleoptera	predator	Chile	Chile	Ctenarytaina eucalypti
Galeopsomyia sp.	Eulophidae	Hymenoptera	pupal parasitoid	Brazil	Brazil	Euselasia eucerus
green lacewings	Chrysopidae	Neuroptera	predator	USA	USA	Glycaspis brimblecombei
green lacewings	Chrysopidae	Neuroptera	predator	Brazil	Brazil	Ctenarytaina spatulata
green lacewings	Chrysopidae	Neuroptera	predator	Portugal	Portugal	Ctenarytaina spatulata
Harmonia axyridis	Coccinellidae	Coleoptera	predator	Eurasia	USA	Glycaspis brimblecombei
Helcostizus rufiscutum	Ichneumonidae	Hymenoptera	parasitoid	North America	USA	Phoracantha semipunctata
Hemerobius bolivari	Hemerobiidae	Neuroptera	predator	South America	Portugal	Thaumastocoris peregrinus
Hippodamia convergens	Coccinellidae	Coleoptera	predator	USA	USA	Glycaspis brimblecombei
hoverflies	Syrphidae	Diptera	predator	Brazil	Brazil	Ctenarytaina spatulata
hoverflies	Syrphidae	Diptera	predator	Portugal	Portugal	Ctenarytaina spatulata
Iridomyrmex humilis	Formicidae	Hymenoptera	omnivores	Europe	Portugal	Phoracantha spp.
Itoplectis sp.	Ichneumonidae	Hymenoptera	pupal parasitoid	Brazil	Brazil	Euselasia eucerus
ladybeetles	Coccinellidae	Coleoptera	predator	Brazil	Brazil	Ctenarytaina spatulata
ladybeetles	Coccinellidae	Coleoptera	predator	Portugal	Portugal	Ctenarytaina spatulata
ladybirds	Coccinellidae	Coleoptera	predator	Portugal	Portugal	Glycaspis brimblecombei
ladybirds	Coccinellidae	Coleoptera	predator	Spain	Spain	Glycaspis brimblecombei
Leprosa milga	Eulophidae	Hymenoptera	parasitoid	Australia	South Africa	Leptocybe invasa
Lespesia sp.	Tachinidae	Diptera	parasitoid	Brazil	Brazil	Eupseudosoma spp.
Megalyra fasciipennis	Megalyridae	Hymenoptera	parasitoid	Australia	South Africa	Phoracantha spp.
Megastigmus brasiliensis	Torymidae	Hymenoptera	parasitoid	Brazil	Brazil	Leptocybe invasa
Megastigmus dharwadicus	Torymidae	Hymenoptera	parasitoid	India	India	Leptocybe invasa
Megastigmus sp.	Torymidae	Hymenoptera	parasitoid	unknown	Morocco	Leptocybe invasa
Megastigmus sp.	Torymidae	Hymenoptera	parasitoid	Israel	Israel	Leptocybe invasa
Megastigmus sp.	Torymidae	Hymenoptera	parasitoid	Turkey	Turkey	Leptocybe invasa
Megastigmus sp.	Torymidae	Hymenoptera	parasitoid	Australia	Sri Lanka	Leptocybe invasa
Megastigmus thitipornae	Torymidae	Hymenoptera	parasitoid	Thailand	Thailand	Leptocybe invasa
Megastigmus zebrinus	Torymidae	Hymenoptera	parasitoid	Australia	Argentina	Leptocybe invasa
Megastigmus zebrinus	Eulophidae	Hymenoptera	parasitoid	Australia	South Africa	Leptocybe invasa
Meteorus pulchricornis	Braconidae	Hymenoptera	larval parasitoid	Palearctic	New Zealand	Uraba lugens
Meteorus trilineatus	Braconidae	Hymenoptera	larval parasitoid	Africa	East Africa	Gonometa podocarpi
minute pirate bugs	Anthocoridae	Hemiptera	predator	Portugal	Portugal	Ctenarytaina spatulata
Neopolycystus insectifurax	Pteromalidae	Hymenoptera	egg parasitoid	Australia	New Zealand	Paropsis charybdis
Nesolynx sp.	Eulophidae	Hymenoptera	pupal parasitoid	Brazil	Brazil	Psorocampa denticulata
Nesolynx sp.	Eulophidae	Hymenoptera	pupal parasitoid	Brazil	Brazil	Myonia pyraloides
not named	Ichneumonidae	Hymenoptera	pupal parasitoid	Brazil	Brazil	Myonia pyraloides
not named	Scelionidae	Hymenoptera	egg parasitoid	Asia	Asia	Helopeltis spp.
not named	Mymaridae	Hymenoptera	egg parasitoid	Asia	Asia	Helopeltis spp.
not named	Braconidae	Hymenoptera	nymphal parasitoid	Asia	Asia	Helopeltis spp.
not named	Carabidae	Coleoptera	predator	Asia	Asia	Helopeltis spp.
not named	not named	Dermaptera	predator	Asia	Asia	Helopeltis spp.
not named	Reduviidae	Hemiptera	predator	Asia	Asia	Helopeltis spp.
not named	Formicidae	Hymenoptera	predator	Asia	Asia	Helopeltis spp.
not named	Tachinidae	Diptera	parasitoid	Brazil	Brazil	Thyrinteina arnobia
not named	Ichneumonidae	Hymenoptera	parasitoid	Brazil	Brazil	Thyrinteina arnobia
not named	Chalcididae	Hymenoptera	parasitoid	Brazil	Brazil	Thyrinteina arnobia
not named	Eulophidae	Hymenoptera	parasitoid	Brazil	Brazil	Thyrinteina arnobia
not named	Pteromalidae	Hymenoptera	parasitoid	Brazil	Brazil	Thyrinteina arnobia
not named	Pentatomidae	Hemiptera	predator	Brazil	Brazil	Thyrinteina arnobia
not named	Carabidae	Coleoptera	predator	Brazil	Brazil	Thyrinteina arnobia
not named	not named	Araneae	predator	Brazil	Brazil	Ctenarytaina spatulata
not named	not named	Araneae	predator	Portugal	Portugal	Ctenarytaina spatulata
not named	Bethylidae	Hymenoptera	larval parasitoid	Brazil	Brazil	Timocratica palpalis
Oechalia schellenbergii	Pentatomidae	Coleoptera	predator	New Zealand, Australia	New Zealand	Gonipterus platensis
Orianos brazai	Encyrtidae	Hymenoptera	egg parasitoid	Philippines	Philippines	Agrilus sexsignatus
Oxyopes sertatus	not named	Araneae	predator	China	China	Leptocybe invasa
Oxysychus genualis	Pteromalidae	Hymenoptera	parasitoid	South Africa	South Africa	Phoracantha semipunctata
Palmistichus elaeisis	Eulophidae	Hymenoptera	pupal parasitoid	Brazil	Brazil	Thyrinteina spp.
Parallelaptera sp.	Mymaridae	Hymenoptera	parasitoid	India	India	Leptocybe invasa
Pheidole pallidula	Formicidae	Hymenoptera	omnivores	Europe	Portugal	Phoracantha spp.
Pimpla mahalensis	Ichneumonidae	Hymenoptera	larval parasitoid	Africa	East Africa	Gonometa podocarpi
Platystasius transversus	Platygasteridae	Hymenoptera	egg parasitoid	unknown	Morocco	Phoracantha semipunctata
Podisus australis	Pentatomidae	Hemiptera	predator	Argentina	Argentina	Thaumastocoris peregrinus
Podisus distinctus	Pentatomidae	Hemiptera	predator	Brazil	Brazil	native caterpillars
Podisus nigrispinus	Pentatomidae	Hemiptera	predator	Brazil	Brazil	Euselasia eucerus
Podisus nigrispinus	Pentatomidae	Hemiptera	predator	Central and South America	Brazil	native caterpillars
Podisus sculptus	Pentatomidae	Hemiptera	predator	Brazil	Brazil	native caterpillars
Psyllaephagus blastopsyllae	Encyrtidae	Hymenoptera	parasitoid	unknown	Cameroon	Blastopsylla occidentalis
Psyllaephagus bliteus	Encyrtidae	Hymenoptera	parasitoid	Australia	USA	Glycaspis brimblecombei
Psyllaephagus bliteus	Encyrtidae	Hymenoptera	parasitoid	Australia	USA	Glycaspis brimblecombei
Psyllaephagus bliteus	Encyrtidae	Hymenoptera	parasitoid	Australia	Brazil	Glycaspis brimblecombei
Psyllaephagus bliteus	Encyrtidae	Hymenoptera	parasitoid	Australia	Chile	Glycaspis brimblecombei
Psyllaephagus bliteus	Encyrtidae	Hymenoptera	parasitoid	Australia	Turkey	Glycaspis brimblecombei
Psyllaephagus bliteus	Encyrtidae	Hymenoptera	parasitoid	Australia	Algeria	Glycaspis brimblecombei
Psyllaephagus bliteus	Encyrtidae	Hymenoptera	parasitoid	Australia	Greece, Italy, Spain, Turkey, Algeria, Morocco	Glycaspis brimblecombei
Psyllaephagus bliteus	Encyrtidae	Hymenoptera	parasitoid	Australia	New Zealand	Glycaspis granulata
Psyllaephagus gemitus	Encyrtidae	Hymenoptera	parasitoid	Australia	New Zealand	Cardiaspina fiscella
Psyllaephagus parvus	Encyrtidae	Hymenoptera	parasitoid	Australia	USA	Eucalyptolyma maideni
Psyllaephagus perplexans	Encyrtidae	Hymenoptera	parasitoid	Australia	USA	Cryptoneossa triangula
Psyllaephagus pilosus	Encyrtidae	Hymenoptera	parasitoid	Australia	Italy	Ctenarytaina eucalypti
Psyllaephagus pilosus	Encyrtidae	Hymenoptera	parasitoid	Australia	USA	Ctenarytaina eucalypti
Psyllaephagus pilosus	Encyrtidae	Hymenoptera	parasitoid	Australia	Portugal, Tunisia	Glycaspis brimblecombei
Psyllaephagus pilosus	Encyrtidae	Hymenoptera	parasitoid	Australia	Argentina	Ctenarytaina eucalypti
Psyllaephagus pilosus	Encyrtidae	Hymenoptera	parasitoid	Australia	Great Britain	Ctenarytaina eucalypti
Psyllaephagus pilosus	Encyrtidae	Hymenoptera	parasitoid	Australia	Brazil	Ctenarytaina eucalypti
Psyllaephagus pilosus	Encyrtidae	Hymenoptera	parasitoid	Australia	France	Ctenarytaina eucalypti
Psyllaephagus pilosus	Encyrtidae	Hymenoptera	parasitoid	Australia	Ireland	Ctenarytaina eucalypti
Psyllaephagus pilosus	Encyrtidae	Hymenoptera	parasitoid	Australia	Chile	Ctenarytaina eucalypti
Psyllaephagus pilosus	Encyrtidae	Hymenoptera	parasitoid	Australia	Germany	Ctenarytaina eucalypti
Psyllaephagus pilosus	Encyrtidae	Hymenoptera	parasitoid	Australia	New Zealand	Ctenarytaina eucalypti
Psyllaephagus richardhenryi	Encyrtidae	Hymenoptera	parasitoid	Australia	New Zealand	Creiis lituratus
Quadrastichus mendeli	Eulophidae	Hymenoptera	parasitoid	Australia	Israel	Leptocybe invasa
Quadrastichus mendeli	Eulophidae	Hymenoptera	parasitoid	Australia	India	Leptocybe invasa
Rhyzobius ventralis	Coccinellidae	Coleoptera	predator	Australia	New Zealand	Eriococcus coriaceus
Selitrichodes kryceri	Eulophidae	Hymenoptera	parasitoid	Australia	Israel	Leptocybe invasa
Selitrichodes neseri	Eulophidae	Hymenoptera	parasitoid	Australia	South Africa	Leptocybe invasa
spiders	not named	Araneae	predator	Portugal	Portugal	Glycaspis brimblecombei
spiders	not named	Araneae	predator	Spain	Spain	Glycaspis brimblecombei
Spilochalcis sp.	Chalcididae	Hymenoptera	pupal parasitoid	Brazil	Brazil	Myonia pyraloides
Stathmopoda melanochra	Stathmopodidae	Lepidoptera	predator	Australia	New Zealand	Eriococcus coriaceus
Stethynium ophelimi	Mymaridae	Hymenoptera	parasitoid	Australia	Israel	Ophelimus maskelli
Sturmia gilvoide	Tachinidae	Diptera	larval parasitoid	Africa	East Africa	Gonometa podocarpi
Supputius cincticeps	Pentatomidae	Hemiptera	predator	Brazil	Brazil	Euselasia eucerus
Supputius cincticeps	Pentatomidae	Hemiptera	predator	Brazil	Brazil	Thaumastocoris peregrinus
Syngaster lepidus	Braconidae	Hymenoptera	larval parasitoid	Australia	USA	Phoracantha spp.
syrphid flies	Syrphidae	Diptera	predator	Colombia	Colombia	Ctenarytaina eucalypti
Syrphoctonus abdominator	Ichneumonidae	Hymenoptera	parasitoid	Portugal	Portugal	Ctenarytaina eucalypti
Telenomus sp.	Scelionidae	Hymenoptera	parasitoid	Australia	Sri Lanka	Leptocybe invasa
Trichogramma acacioi	Trichogrammatidae	Lepidoptera	egg parasitoid	Brazil	Brazil	Psorocampa denticulata
Trichogramma acacioi	Trichogrammatidae	Hymenoptera	egg parasitoid	Brazil	Brazil	Euselasia eucerus
Trichogramma caiaposi	Trichogrammatidae	Lepidoptera	egg parasitoid	Brazil	Brazil	Erinnyis ello
Trichogramma demoraesi	Trichogrammatidae	Hymenoptera	egg parasitoid	Brazil	Brazil	Euselasia eucerus
Trichogramma demoraesi	Trichogrammatidae	Lepidoptera	egg parasitoid	Brazil	Brazil	Glena bipennaria
Trichogramma manicobai	Trichogrammatidae	Lepidoptera	egg parasitoid	Brazil	Brazil	Erinnyis ello
Trichogramma maxacalii	Trichogrammatidae	Hymenoptera	egg parasitoid	Brazil	Brazil	Euselasia eucerus
Trichogramma maxacalii	Trichogrammatidae	Hymenoptera	egg parasitoid	Brazil	Brazil	Euselasia euploea
Trichogramma soaresi	Trichogrammatidae	Lepidoptera	egg parasitoid	Brazil	Brazil	native caterpillars
Trichospilus diatraeae	Eulophidae	Hymenoptera	pupal parasitoid	Brazil	Brazil	Thyrinteina arnobia
Trigonospila brevifacies	Tachinidae	Diptera	larval parasitoid	Australia	New Zealand	Strepsicrates macropetana
Ugimyia sericariae	Tachinidae	Diptera	parasitoid	India	India	Trabala vishnou
unknown sp.	Tachinidae	Diptera	parasitoid	South Africa	South Africa	Neocleora herbuloti
Vespula germanica	Vespidae	Hymenoptera	predator	Chile	Chile	Ctenarytaina eucalypti
Xanthopimpla rhopaloceros	Ichneumonidae	Hymenoptera	pupal parasitoid	Australia	New Zealand	Uraba lugens
Zeala sp.	not named	Hymenoptera	parasitoid	China	China	Leptocybe invasa
Zelus armillatus	Reduviidae	Hemiptera	predator	Brazil	Brazil	Thyrinteina arnobia
Zelus renardii	Reduviidae	Hemiptera	predator	USA	USA	Glycaspis brimblecombei

## Sheet: Native colonisers
Insect species	Family	Order	Guild	Region or country of origin	Region or country of record
Acanthoxyla sp.	Phasmatidae	Phasmatodea	leaf chewer	New Zealand	New Zealand
Achaea lienardi	Erebidae	Lepidoptera	leaf chewer	Africa	South Africa
Achradidius creticus	Curculionidae	Coleoptera	leaf chewer	Middle East	Israel
Acromyrmex spp.	Formicidae	Hymenoptera	leaf chewer	South America	Brazil
Adoxophyes honmai	Tortricidae	Lepidoptera	leaf chewer	SE Asia	Japan
Aenetus virescens	Hepialidae	Lepidoptera	wood borer	New Zealand	New Zealand
Agathomerus sellatus	Chrysomelidae	Coleoptera	leaf chewer	Brazil	Brazil
Agrilus opulentus	Buprestidae	Coleoptera	wood borer	Asia	Papua New Guinea
Agrilus sexsignatus	Buprestidae	Coleoptera	wood borer	Philippines	Philippines
Allodontotermes schultzei	Termitidae	Isoptera	termites	Africa	Africa
Amblypelta cocophaga	Coreidae	Hemiptera	sap sucker	Pacific	Solomon Islands
Amitermes truncatidens	Termitidae	Isoptera	termites	Africa	Africa
Ancistrotermes latinotus	Termitidae	Isoptera	termites	Africa	Africa
Anomala cupripes	Scarabaeidae	Coleoptera	leaf chewer	Asia	China, Hong Kong
Anoplotermes pacificus	Termitidae	Isoptera	termites	South America	South America
Apate monachus	Bostrichidae	Coleoptera	wood borer	Africa	Israel
Apatelodes sericea	Apatelodidae	Lepidoptera	leaf chewer	Brazil	Brazil
Aristobia approximator	Cerambycidae	Coleoptera	wood borer	Asia	Vietnam
Armitermes euamignathus	Termitidae	Isoptera	termites	South America	Bolivia, Brazil, Paraguay
Atta spp.	Formicidae	Hymenoptera	leaf chewer	Central, South America	Central, South America
Automeris illustris	Saturniidae	Lepidoptera	leaf chewer	Brazil	Brazil
Automeris sp.	Saturniidae	Lepidoptera	leaf chewer	Brazil	Brazil
Baeacris sp.	Acrididae	Orthoptera	leaf chewer	South America	Paraguay
Batocera horsefieldi	Cerambycidae	Coleoptera	wood borer	China	China
Biston suppressaria	Geometridae	Lepidoptera	leaf chewer	India, China	China
Blera sp.	Notodontidae	Lepidoptera	leaf chewer	Brazil	Brazil
Blera varana	Notodontidae	Lepidoptera	leaf chewer	Brazil	Brazil
Bolax flavolineata	Scarabaeidae	Coleoptera	leaf chewer	Brazil	Brazil
Cacoscelis marginata	Chrysomelidae	Coleoptera	leaf chewer	Brazil	Brazil
Caedicia simplex	Tettigoniidae	Orthoptera	leaf chewer	New Zealand	New Zealand
Callipogon luctuosum	Cerambycidae	Coleoptera	wood borer	Brazil	Brazil
Capritermes nitobei	Termitidae	Isoptera	termites	China	China
Capua plagiatana	Tortricidae	Lepidoptera	leaf chewer	New Zealand	New Zealand
Carea angulata	Noctuidae	Lepidoptera	leaf chewer	Asia	China
carpenter bee	Apidae	Hymenoptera	wood borer	China	China
Celosterna scabrator	Cerambycidae	Coleoptera	wood borer	Asia	India
Chalia larminati	Psychidae	Lepidoptera	leaf chewer	China	China
Charidotis marginella	Chrysomelidae	Coleoptera	leaf chewer	Brazil	Brazil
Chilecomadia valdiviana	Cossidae	Lepidoptera	wood borer	Chile	Chile
Chlorida festiva	Cerambycidae	Coleoptera	wood borer	Brazil	Brazil
Chrysobothris sp.	Buprestidae	Coleoptera	wood borer	Brazil	Brazil
Chydarteres striatus	Cerambycidae	Coleoptera	wood borer	Brazil	Brazil
Citheronia lobesis lobesis	Saturniidae	Lepidoptera	leaf chewer	Brazil	Brazil
Citheronia marion	Saturniidae	Lepidoptera	leaf chewer	Brazil	Brazil
Cleora scriptaria	Geometridae	Lepidoptera	leaf chewer	New Zealand	New Zealand
Colaspis quadrimaculata	Chrysomelidae	Coleoptera	leaf chewer	Brazil	Brazil
Colaspis rustica	Chrysomelidae	Coleoptera	leaf chewer	Brazil	Brazil
Conognata magnifica	Buprestidae	Coleoptera	wood borer	Brazil	Brazil
Coptotermes curvignathus	Rhinotermitidae	Isoptera	termites	Asia	Malaysia
Coptotermes formosanus	Rhinotermitidae	Isoptera	termites	Asia	China
Coptotermes heimi	Rhinotermitidae	Isoptera	termites	India	India
Coptotermes testaceus	Rhinotermitidae	Isoptera	termites	Central, South America	Central, South America
Coptotermes truncatus	Rhinotermitidae	Isoptera	termites	Africa	Seychelles
Cornitermes cumulans	Termitidae	Isoptera	termites	South America	Argentina, Brazil, Paraguay
Coryphodema tristis	Cossidae	Lepidoptera	wood borer	South Africa	South Africa
Cosmosoma auge	Ctenuchidae	Lepidoptera	leaf chewer	Brazil	Brazil
Costalimaita ferruginea	Chrysomelidae	Coleoptera	leaf chewer	South America	Brazil
Costalimaita lurida	Chrysomelidae	Coleoptera	leaf chewer	Brazil	Brazil
Ctenopseustis obliquana	Tortricidae	Lepidoptera	leaf chewer	New Zealand	New Zealand
Cylindrotermes sp.	Termitidae	Isoptera	termites	Brazil	Brazil
Cymatobaris impressifrons	Curculionidae	Coleoptera	leaf chewer	Brazil	Brazil
Cyphus luridus	Curculionidae	Coleoptera	leaf chewer	Brazil	Brazil
Cyphus sp.	Curculionidae	Coleoptera	leaf chewer	Brazil	Brazil
Declana floccosa	Geometridae	Lepidoptera	leaf chewer	New Zealand	New Zealand
Didymocantha sp.	Cerambycidae	Coleoptera	wood borer	New Zealand	New Zealand
Dirphia rosacordis	Saturniidae	Lepidoptera	leaf chewer	Brazil	Brazil
Dorcadocerus barbatus	Cerambycidae	Coleoptera	wood borer	Brazil	Brazil
Doryphora dilaticollis	Chrysomelidae	Coleoptera	leaf chewer	Brazil	Brazil
Eacles imperialis	Saturniidae	Lepidoptera	leaf chewer	Brazil	Brazil
Ectinogonia buquetti	Buprestidae	Coleoptera	wood borer	Chile	Chile
Ectropis excellens	Geometridae	Lepidoptera	leaf chewer	Japan	Japan
Embiratermes sp.	Termitidae	Isoptera	termites	Brazil	Brazil
Endoclita hosei	Hepialidae	Lepidoptera	wood borer	Asia	Malaysia
Endoclita signifer	Hepialidae	Lepidoptera	wood borer	China	China
Endoclita undulifer	Hepialidae	Lepidoptera	wood borer	India	India
Eucolaspis brunnea	Chrysomelidae	Coleoptera	leaf chewer	New Zealand	New Zealand
Eumolpus surinamensis	Chrysomelidae	Coleoptera	leaf chewer	Brazil, Suriname	Brazil
Eupseudosoma aberrans	Arctiidae	Lepidoptera	leaf chewer	Brazil	Brazil
Eupseudosoma involuta	Arctiidae	Lepidoptera	leaf chewer	Brazil	Brazil
Eurynotia hochstetteri	Curculionidae	Coleoptera	leaf chewer	New Zealand	New Zealand
Eurytermes topslippensis	Termitidae	Isoptera	termites	India	India
Euselasia apison	Riodinidae	Lepidoptera	leaf chewer	Brazil	Brazil
Euselasia eucerus	Riodinidae	Lepidoptera	leaf chewer	Brazil	Brazil
Euselasia hygenius	Riodinidae	Lepidoptera	leaf chewer	Brazil	Brazil
Fergusonina sp.	Agromyzidae	Diptera	gall former	unknown	Philippines
Gelonia dejectaria	Geometridae	Lepidoptera	leaf chewer	New Zealand	New Zealand
Geniates barbatus	Scarabaeidae	Coleoptera	leaf chewer	Brazil	Brazil
Glena sp.	Geometridae	Lepidoptera	leaf chewer	Brazil	Brazil
Glena unipennaria	Geometridae	Lepidoptera	leaf chewer	Brazil	Brazil
Gonometa podocarpi	Lasiocampidae	Lepidoptera	leaf chewer	sub-Saharan Africa	East Africa
Hastertia bougainvillea	Cerambycidae	Coleoptera	wood borer	Pacific	Papua New Guinea
Heilipodus naevulus	Curculionidae	Coleoptera	leaf chewer	Brazil	Brazil
Heilipus fallax	Curculionidae	Coleoptera	leaf chewer	Brazil	Brazil
Helicoverpa armigera	Noctuidae	Lepidoptera	leaf chewer	cosmopolitan	New Zealand
Helopeltis spp.	Miridae	Hemiptera	sap sucker	Asia	India, Indonesia
Heterotermes tenuis	Rhinotermitidae	Isoptera	termites	South America	Brazil
Homalodisca vitripennis	Cicadellidae	Hemiptera	sap sucker	South America	USA
Hoplopactus injucundus	Curculionidae	Coleoptera	leaf chewer	Brazil	Brazil
Hylesia paulex	Saturniidae	Lepidoptera	leaf chewer	Brazil	Brazil
Hyperchiria incisa	Saturniidae	Lepidoptera	leaf chewer	Brazil	Brazil
Hypomeces squamosus	Curculionidae	Coleoptera	leaf chewer	Thailand	Thailand
Hyposidra talaca	Geometridae	Lepidoptera	leaf chewer	SE Asia	Japan
Hypsonotus sp.	Curculionidae	Coleoptera	leaf chewer	Brazil	Brazil
Idalus admirabilis	Arctiidae	Lepidoptera	leaf chewer	Brazil	Brazil
Idalus affinis	Arctiidae	Lepidoptera	leaf chewer	Brazil	Brazil
Imbrasia cytherea	Saturniidae	Lepidoptera	leaf chewer	South Africa	South Africa
Iridopsis subferaria	Geometridae	Lepidoptera	leaf chewer	Brazil	Brazil
Lampetis cicatricosa	Buprestidae	Coleoptera	leaf chewer	Brazil	Brazil
Lampetis cupreosparsa	Buprestidae	Coleoptera	leaf chewer	Brazil	Brazil
Lampetis dives	Buprestidae	Coleoptera	leaf chewer	Brazil	Brazil
Lampetis doncheri	Buprestidae	Coleoptera	leaf chewer	Brazil	Brazil
Lampetis elegans	Buprestidae	Coleoptera	leaf chewer	Brazil	Brazil
Lampetis hirtomaculata	Buprestidae	Coleoptera	leaf chewer	Brazil	Brazil
Lampetis instabilis	Buprestidae	Coleoptera	leaf chewer	Brazil	Brazil
Lampetis nigerrima	Buprestidae	Coleoptera	leaf chewer	Brazil	Brazil
Lampetis pulverea	Buprestidae	Coleoptera	leaf chewer	Brazil	Brazil
Lampetis solieri	Buprestidae	Coleoptera	leaf chewer	Brazil	Brazil
Lasiopus cilipes	Curculionidae	Coleoptera	leaf chewer	Brazil	Brazil
Leucothyreus albopilosus	Scarabaeidae	Coleoptera	leaf chewer	South America	Brazil
Leucothyreus niveicollis	Scarabaeidae	Coleoptera	leaf chewer	Brazil	Brazil
Liothula omnivora	Psychidae	Lepidoptera	leaf chewer	New Zealand	New Zealand
Lobesia aeolopa	Tortricidae	Lepidoptera	leaf chewer	Japan	Japan
longicorn jewel beetle	Cerambycidae	Coleoptera	wood borer	China	China
Lydamis variegatus	Curculionidae	Coleoptera	leaf chewer	Brazil	Brazil
Lymantria dispar albescens	Lymantriidae	Lepidoptera	leaf chewer	Asia	Japan
Macrotermes annandalei	Termitidae	Isoptera	termites	Asia	China
Macrotermes barneyi	Termitidae	Isoptera	termites	China	China
Macrotermes bellicosus	Termitidae	Isoptera	termites	Africa	Africa
Macrotermes falciger	Termitidae	Isoptera	termites	Africa	Africa
Macrotermes malaccensis	Termitidae	Isoptera	termites	Asia	Indonesia
Macrotermes michaelseni	Termitidae	Isoptera	termites	Africa	Africa
Macrotermes natalensis	Termitidae	Isoptera	termites	Africa	Africa
Melanolophia consimilaria	Geometridae	Lepidoptera	leaf chewer	Brazil	Brazil
Metallactus quindecimguttatus	Chrysomelidae	Coleoptera	leaf chewer	Brazil	Brazil
Metaxyonycha angustata	Chrysomelidae	Coleoptera	leaf chewer	Brazil, French Guiana	Brazil, French Guiana
Metriona spp.	Chrysomelidae	Coleoptera	leaf chewer	Brazil	Brazil
Microcerotermes minor	Termitidae	Isoptera	termites	India	India
Microtermes obesi	Termitidae	Isoptera	termites	Asia	India
Microtermes spp.	Termitidae	Isoptera	termites	Africa, SE Asia	Africa, SE Asia
Miremorphus eucalypti	Curculionidae	Coleoptera	leaf chewer	Brazil	Brazil
Myllocerus spp.	Curculionidae	Coleoptera	leaf chewer	India	India
Myllocerus viridanus	Curculionidae	Coleoptera	leaf chewer	India	India
Myochorus armatus	Chrysomelidae	Coleoptera	leaf chewer	Brazil	Brazil
Myonia pyraloides	Notodontidae	Lepidoptera	leaf chewer	Brazil	Brazil
Narosa viridana	Limacodidae	Lepidoptera	leaf chewer	Africa	Zambia
Nasutitermes aquilinus	Termitidae	Isoptera	termites	South America	Argentina, Brazil, Paraguay
Naupactus bipes	Curculionidae	Coleoptera	leaf chewer	South America	Brazil
Naupactus condecoratus	Curculionidae	Coleoptera	leaf chewer	South America	Brazil
Naupactus elegans	Curculionidae	Coleoptera	leaf chewer	South America	Brazil
Naupactus longimanus	Curculionidae	Coleoptera	leaf chewer	South America	Brazil
Naupactus xanthographus	Curculionidae	Coleoptera	leaf chewer	South America	Brazil
Navomorpha lineata	Cerambycidae	Coleoptera	wood borer	New Zealand	New Zealand
Navomorpha sulcata	Cerambycidae	Coleoptera	wood borer	New Zealand	New Zealand
Neocapritermes opacus	Termitidae	Isoptera	termites	South America	South America
Neocleora herbuloti	Geometridae	Lepidoptera	leaf chewer	Central Africa	South Africa
Nystalea nyseus	Notodontidae	Lepidoptera	leaf chewer	Brazil	Brazil
Odontotermes anamallensis	Termitidae	Isoptera	termites	India	India
Odontotermes bellahunisensis	Termitidae	Isoptera	termites	India	India
Odontotermes brunneus	Termitidae	Isoptera	termites	India	India
Odontotermes ceylonicus	Termitidae	Isoptera	termites	India	India
Odontotermes distans	Termitidae	Isoptera	termites	India	India
Odontotermes feae	Termitidae	Isoptera	termites	India	India
Odontotermes formosanus	Termitidae	Isoptera	termites	Asia	China
Odontotermes guptai	Termitidae	Isoptera	termites	India	India
Odontotermes gurudaspurensis	Termitidae	Isoptera	termites	India	India
Odontotermes hainanensis	Termitidae	Isoptera	termites	Asia	China
Odontotermes horni	Termitidae	Isoptera	termites	Sri Lanka	India
Odontotermes malabaricus	Termitidae	Isoptera	termites	India	India
Odontotermes microdentatus	Termitidae	Isoptera	termites	India	India
Odontotermes obesus	Termitidae	Isoptera	termites	India	India
Odontotermes redemanni	Termitidae	Isoptera	termites	India	India
Odontotermes roonwali	Termitidae	Isoptera	termites	India	India
Odontotermes spp.	Termitidae	Isoptera	termites	Africa	Zambia, Zimbabwe
Odontotermes wallonensis	Termitidae	Isoptera	termites	India	India
Oemona hirta	Cerambycidae	Coleoptera	wood borer	New Zealand	New Zealand
Orgyia postica	Lymantriidae	Lepidoptera	leaf chewer	Asia and India	Japan
Oxydia vesulia	Geometridae	Lepidoptera	leaf chewer	Brazil	Brazil
Oxymagis horni	Cerambycidae	Coleoptera	wood borer	Pacific	Papua New Guinea
Oxymerus aculeatus	Cerambycidae	Coleoptera	wood borer	Brazil	Brazil
Oxymerus basalis	Cerambycidae	Coleoptera	wood borer	Brazil	Brazil
Pericapritermes assamensis	Termitidae	Isoptera	termites	India	India
Pericapritermes vythirii	Termitidae	Isoptera	termites	India	India
Phaedropus sp.	Curculionidae	Coleoptera	leaf chewer	Brazil	Brazil
Phaops adamantine	Curculionidae	Coleoptera	leaf chewer	Brazil	Brazil
Philoclaenia tricostata	Scarabaeidae	Coleoptera	leaf chewer	Brazil	Brazil
Planotortrix excessana	Tortricidae	Lepidoptera	leaf chewer	New Zealand	New Zealand
Planotortrix notophaea	Tortricidae	Lepidoptera	leaf chewer	New Zealand	New Zealand
Platypus apicalis	Platypodidae	Coleoptera	wood borer	New Zealand	New Zealand
Platypus gracilis	Platypodidae	Coleoptera	wood borer	New Zealand	New Zealand
Platypus hintzi	Platypodidae	Coleoptera	wood borer	Africa	sub-saharan Africa
Platypus solidus	Platypodidae	Coleoptera	wood borer	Asia	Malaysia
Podalia walkeri	Megalopygidae	Lepidoptera	leaf chewer	Brazil	Brazil
Postelectrotermes militaris	Kalotermitidae	Isoptera	termites	Sri Lanka	Sri Lanka
Procornitermes araujoi	Termitidae	Isoptera	termites	Brazil	Brazil
Procornitermes striatus	Termitidae	Isoptera	termites	South America	South America
Procornitermes triacifer	Termitidae	Isoptera	termites	South America	Argentina, Bolivia, Brazil
Pseudacanthotermes militaris	Termitidae	Isoptera	termites	Africa	Africa
Pseudacanthotermes spiniger	Termitidae	Isoptera	termites	Africa	Africa
Pseudocoremia suavis	Geometridae	Lepidoptera	leaf chewer	New Zealand	New Zealand
Psiloptera argyrophora	Buprestidae	Coleoptera	leaf chewer	Brazil	Brazil
Psiloptera attenuata	Buprestidae	Coleoptera	leaf chewer	Brazil	Brazil
Psiloptera hirtomaculata	Buprestidae	Coleoptera	leaf chewer	Brazil	Brazil
Psiloptera hoffmanni	Buprestidae	Coleoptera	leaf chewer	Brazil	Brazil
Psiloptera pardalis	Buprestidae	Coleoptera	leaf chewer	Brazil	Brazil
Psorocampa denticulata	Notodontidae	Lepidoptera	leaf chewer	Brazil	Brazil
Pyronota festiva	Scarabaeidae	Coleoptera	leaf chewer	New Zealand	New Zealand
Pyrrhopyge pelota	Hesperiidae	Lepidoptera	leaf chewer	Brazil, Bolivia, Paraguay	Argentina
Retrachydes thoracicus	Cerambycidae	Coleoptera	wood borer	Brazil	Brazil
Rhigus tribuloides	Curculionidae	Coleoptera	leaf chewer	Brazil	Brazil
Rhynchotermes sp.	Termitidae	Isoptera	termites	Brazil	Brazil
Sabulodes caberata	Geometridae	Lepidoptera	leaf chewer	Brazil	Brazil
Sahyadrassus malabaricus	Hepialidae	Lepidoptera	wood borer	India	India
Sarsina violascens	Lymantriidae	Lepidoptera	leaf chewer	Brazil	Brazil
Schedorhinotermes malaccensis	Rhinotermitidae	Isoptera	termites	Indonesia	Indonesia
Spodoptera cosmioides	Noctuidae	Lepidoptera	leaf chewer	Brazil	Brazil
Stegotes sanguinicollis	Curculionidae	Coleoptera	leaf chewer	Brazil	Brazil
Stenalcidia grosica	Geometridae	Lepidoptera	leaf chewer	Brazil	Brazil
Stenopotes pallidus	Cerambycidae	Coleoptera	wood borer	New Zealand	New Zealand
Sternocolaspis quatuordecimcostata	Chrysomelidae	Coleoptera	leaf chewer	Brazil	Brazil
Strepsicrates rhothia	Tortricidae	Lepidoptera	leaf chewer	Asia	Africa and Asia
Strepsicrates semicanella	Tortricidae	Lepidoptera	leaf chewer	Japan	Japan
Strepsicrates spp.	Tortricidae	Lepidoptera	leaf chewer	Africa, Asia, Pacific	Ghana, Nigeria, China, India, Malaysia, Philippines
Subulitermes sp.	Termitidae	Isoptera	termites	Brazil	Brazil
Synacanthotermes zanzibarensis	Termitidae	Isoptera	termites	Africa	Africa
Syntermes insidians	Termitidae	Isoptera	termites	Brazil	Brazil
Syntermes nanus	Termitidae	Isoptera	termites	South America	Argentina, Brazil, Paraguay
Thyrinteina arnobia	Geometridae	Lepidoptera	leaf chewer	Brazil	Brazil, Chile
Thyrinteina leucoceraea	Geometridae	Lepidoptera	leaf chewer	Brazil	Brazil
Timocratica palpalis	Stenomatidae	Lepidoptera	wood borer	Brazil	Brazil
Trabala vishnou	Lasiocampidae	Lepidoptera	leaf chewer	SE Asia	India, Vietnam
Trichophassus giganteus	Hepialidae	Lepidoptera	wood borer	Brazil	Brazil
Trinervitermes biformis	Termitidae	Isoptera	termites	Africa	India
Trioza spp.	Psyllidae	Hemiptera	sap sucker	cosmopolitan	India
Xuthodes punctipennis	Cerambycidae	Coleoptera	wood borer	New Zealand	New Zealand
Zeuzera coffeae	Cossidae	Lepidoptera	wood borer	Asia	Papua New Guinea

## Sheet: Australian invaders
Insect species	Family	Order	Guild	Region or country of record	Year of first record or publication (P)
Acrocercops laciniella	Gracillariidae	Lepidoptera	leaf chewer	New Zealand	1999
Aleuroclava eucalypti	Aleyrodidae	Hemiptera	sap sucker	New Zealand	1950
Anoeconeossa communis	Psyllidae	Hemiptera	sap sucker	New Zealand	2002
Blastopsylla occidentalis	Psyllidae	Hemiptera	sap sucker	Turkey	2007
Blastopsylla occidentalis	Psyllidae	Hemiptera	sap sucker	Argentina	2004
Blastopsylla occidentalis	Psyllidae	Hemiptera	sap sucker	Chile	1999
Blastopsylla occidentalis	Psyllidae	Hemiptera	sap sucker	Egypt	2007
Blastopsylla occidentalis	Psyllidae	Hemiptera	sap sucker	Israel	2008
Blastopsylla occidentalis	Psyllidae	Hemiptera	sap sucker	Kenya	2005
Blastopsylla occidentalis	Psyllidae	Hemiptera	sap sucker	Paraguay	2007
Blastopsylla occidentalis	Psyllidae	Hemiptera	sap sucker	Portugal	2009
Blastopsylla occidentalis	Psyllidae	Hemiptera	sap sucker	South Africa	2007
Blastopsylla occidentalis	Psyllidae	Hemiptera	sap sucker	Mexico	1989
Blastopsylla occidentalis	Psyllidae	Hemiptera	sap sucker	Italy	P2006
Blastopsylla occidentalis	Psyllidae	Hemiptera	sap sucker	Uruguay	2010
Blastopsylla occidentalis	Psyllidae	Hemiptera	sap sucker	USA	1983
Blastopsylla occidentalis	Psyllidae	Hemiptera	sap sucker	Spain	2009
Blastopsylla occidentalis	Psyllidae	Hemiptera	sap sucker	Brazil	1997
Blastopsylla occidentalis	Psyllidae	Hemiptera	sap sucker	Israel	2008
Blastopsylla occidentalis	Psyllidae	Hemiptera	sap sucker	Cameroon	2006
Blastopsylla occidentalis	Psyllidae	Hemiptera	sap sucker	New Zealand	1976
Blastopsylla occidentalis	Psyllidae	Hemiptera	sap sucker	China	2011
Callidiopsis scutellaris	Cerambycidae	Coleoptera	wood borer	New Zealand	1935
Cardiaspina fiscella	Psyllidae	Hemiptera	sap sucker	New Zealand	1996
Chrysophtharta m-fuscum	Chrysomelidae	Coleoptera	leaf chewer	USA	2003
Creiis lituratus	Psyllidae	Hemiptera	sap sucker	New Zealand	2002
Cryptoneossa triangula	Psyllidae	Hemiptera	sap sucker	USA	1995
Cryptoneossa triangula	Psyllidae	Hemiptera	sap sucker	New Zealand	1996
Ctenarytaina eucalypti	Psyllidae	Hemiptera	sap sucker	Italy	1982
Ctenarytaina eucalypti	Psyllidae	Hemiptera	sap sucker	USA	1991
Ctenarytaina eucalypti	Psyllidae	Hemiptera	sap sucker	Argentina	2005
Ctenarytaina eucalypti	Psyllidae	Hemiptera	sap sucker	Bolivia	1999
Ctenarytaina eucalypti	Psyllidae	Hemiptera	sap sucker	Chile	1999
Ctenarytaina eucalypti	Psyllidae	Hemiptera	sap sucker	Colombia	1994
Ctenarytaina eucalypti	Psyllidae	Hemiptera	sap sucker	Kenya	2014
Ctenarytaina eucalypti	Psyllidae	Hemiptera	sap sucker	Papua New Guinea	1983
Ctenarytaina eucalypti	Psyllidae	Hemiptera	sap sucker	Portugal	1971
Ctenarytaina eucalypti	Psyllidae	Hemiptera	sap sucker	South Africa	1925
Ctenarytaina eucalypti	Psyllidae	Hemiptera	sap sucker	Spain	1972
Ctenarytaina eucalypti	Psyllidae	Hemiptera	sap sucker	Sri Lanka	1979
Ctenarytaina eucalypti	Psyllidae	Hemiptera	sap sucker	Switzerland	2014
Ctenarytaina eucalypti	Psyllidae	Hemiptera	sap sucker	Uruguay	1998
Ctenarytaina eucalypti	Psyllidae	Hemiptera	sap sucker	Spain	1972
Ctenarytaina eucalypti	Psyllidae	Hemiptera	sap sucker	Ireland	1979
Ctenarytaina eucalypti	Psyllidae	Hemiptera	sap sucker	France	1925
Ctenarytaina eucalypti	Psyllidae	Hemiptera	sap sucker	Morocco	2008
Ctenarytaina eucalypti	Psyllidae	Hemiptera	sap sucker	Brazil	1998
Ctenarytaina eucalypti	Psyllidae	Hemiptera	sap sucker	Germany	2000
Ctenarytaina eucalypti	Psyllidae	Hemiptera	sap sucker	New Zealand	1890
Ctenarytaina longicauda	Psyllidae	Hemiptera	sap sucker	USA	1983
Ctenarytaina peregrina	Psyllidae	Hemiptera	sap sucker	France	pre-2011
Ctenarytaina peregrina	Psyllidae	Hemiptera	sap sucker	Europe	2007
Ctenarytaina spatulata	Psyllidae	Hemiptera	sap sucker	Uruguay	1995
Ctenarytaina spatulata	Psyllidae	Hemiptera	sap sucker	France	2003
Ctenarytaina spatulata	Psyllidae	Hemiptera	sap sucker	Italy	2003
Ctenarytaina spatulata	Psyllidae	Hemiptera	sap sucker	Spain	2004
Ctenarytaina spatulata	Psyllidae	Hemiptera	sap sucker	Brazil	1994
Ctenarytaina spatulata	Psyllidae	Hemiptera	sap sucker	USA	1991
Ctenarytaina spatulata	Psyllidae	Hemiptera	sap sucker	New Zealand	1990
Ctenarytaina spatulata	Psyllidae	Hemiptera	sap sucker	Portugal	2002
Ctenarytaina spatulata	Psyllidae	Hemiptera	sap sucker	Spain	2003
Epichrysocharis burwelli	Eulophidae	Hymenoptera	gall former	USA	1999
Eriococcus coriaceus	Eriococcidae	Hemiptera	sap sucker	New Zealand	1900
Eucalyptolyma maideni	Psyllidae	Hemiptera	sap sucker	USA	2000
Eucalyptolyma maideni	Psyllidae	Hemiptera	sap sucker	New Zealand	1996
Glycaspis brimblecombei	Psyllidae	Hemiptera	sap sucker	Argentina	2005
Glycaspis brimblecombei	Psyllidae	Hemiptera	sap sucker	France	pre-2011
Glycaspis brimblecombei	Psyllidae	Hemiptera	sap sucker	USA	1998
Glycaspis brimblecombei	Psyllidae	Hemiptera	sap sucker	Portugal	2007
Glycaspis brimblecombei	Psyllidae	Hemiptera	sap sucker	Tunisia	2010
Glycaspis brimblecombei	Psyllidae	Hemiptera	sap sucker	Chile	2002
Glycaspis brimblecombei	Psyllidae	Hemiptera	sap sucker	Mauritius	2001
Glycaspis brimblecombei	Psyllidae	Hemiptera	sap sucker	Mexico	2000
Glycaspis brimblecombei	Psyllidae	Hemiptera	sap sucker	Venezuela	2007
Glycaspis brimblecombei	Psyllidae	Hemiptera	sap sucker	Turkey	2014
Glycaspis brimblecombei	Psyllidae	Hemiptera	sap sucker	Morocco	2009
Glycaspis brimblecombei	Psyllidae	Hemiptera	sap sucker	Greece	2013
Glycaspis brimblecombei	Psyllidae	Hemiptera	sap sucker	Ecuador	2006
Glycaspis brimblecombei	Psyllidae	Hemiptera	sap sucker	Colombia	2005
Glycaspis brimblecombei	Psyllidae	Hemiptera	sap sucker	South Africa	2012
Glycaspis brimblecombei	Psyllidae	Hemiptera	sap sucker	Brazil	2003
Glycaspis brimblecombei	Psyllidae	Hemiptera	sap sucker	Israel	2014
Glycaspis brimblecombei	Psyllidae	Hemiptera	sap sucker	Algeria	2012
Glycaspis brimblecombei	Psyllidae	Hemiptera	sap sucker	Italy	2010
Glycaspis brimblecombei	Psyllidae	Hemiptera	sap sucker	Madagascar	2014
Glycaspis brimblecombei	Psyllidae	Hemiptera	sap sucker	Montenegro	2012
Glycaspis brimblecombei	Psyllidae	Hemiptera	sap sucker	Peru	2008
Glycaspis brimblecombei	Psyllidae	Hemiptera	sap sucker	Portugal	2007
Glycaspis brimblecombei	Psyllidae	Hemiptera	sap sucker	Spain	2007
Glycaspis brimblecombei	Psyllidae	Hemiptera	sap sucker	Uruguay	2006
Glycaspis granulata	Psyllidae	Hemiptera	sap sucker	New Zealand	1986
Gonipterus platensis	Curculionidae	Coleoptera	leaf chewer	USA	1994
Gonipterus platensis	Curculionidae	Coleoptera	leaf chewer	Brazil	1954
Gonipterus platensis	Curculionidae	Coleoptera	leaf chewer	Argentina	1925
Gonipterus platensis	Curculionidae	Coleoptera	leaf chewer	France	1977
Gonipterus platensis	Curculionidae	Coleoptera	leaf chewer	Italy	1975
Gonipterus platensis	Curculionidae	Coleoptera	leaf chewer	Kenya	1944
Gonipterus platensis	Curculionidae	Coleoptera	leaf chewer	Lesotho	1986
Gonipterus platensis	Curculionidae	Coleoptera	leaf chewer	Madagascar	1950
Gonipterus platensis	Curculionidae	Coleoptera	leaf chewer	Malawi	1937
Gonipterus platensis	Curculionidae	Coleoptera	leaf chewer	Mauritius	1940
Gonipterus platensis	Curculionidae	Coleoptera	leaf chewer	Mozambique	1986
Gonipterus platensis	Curculionidae	Coleoptera	leaf chewer	Portugal	2010
Gonipterus platensis	Curculionidae	Coleoptera	leaf chewer	South Africa	1916
Gonipterus platensis	Curculionidae	Coleoptera	leaf chewer	Swaziland	1977
Gonipterus platensis	Curculionidae	Coleoptera	leaf chewer	Uganda	1944
Gonipterus platensis	Curculionidae	Coleoptera	leaf chewer	Uruguay	1943
Gonipterus platensis	Curculionidae	Coleoptera	leaf chewer	Zimbabwe	1940
Gonipterus platensis	Curculionidae	Coleoptera	leaf chewer	Chile	1998
Gonipterus platensis	Curculionidae	Coleoptera	leaf chewer	New Zealand	1890
Gonipterus platensis	Curculionidae	Coleoptera	leaf chewer	Spain	1991
Lepidosaphes eucalypti	Diaspididae	Hemiptera	sap sucker	New Zealand	1922
Leptocybe invasa	Eulophidae	Hymenoptera	gall former	Argentina	2009
Leptocybe invasa	Eulophidae	Hymenoptera	gall former	Turkey	2000
Leptocybe invasa	Eulophidae	Hymenoptera	gall former	Portugal	2003
Leptocybe invasa	Eulophidae	Hymenoptera	gall former	Mozambique	2011
Leptocybe invasa	Eulophidae	Hymenoptera	gall former	France	2005
Leptocybe invasa	Eulophidae	Hymenoptera	gall former	Spain	2003
Leptocybe invasa	Eulophidae	Hymenoptera	gall former	Syria	2001
Leptocybe invasa	Eulophidae	Hymenoptera	gall former	South Africa	2007
Leptocybe invasa	Eulophidae	Hymenoptera	gall former	Morocco	2002
Leptocybe invasa	Eulophidae	Hymenoptera	gall former	Israel	2000
Leptocybe invasa	Eulophidae	Hymenoptera	gall former	Algeria	2002
Leptocybe invasa	Eulophidae	Hymenoptera	gall former	Brazil	2007
Leptocybe invasa	Eulophidae	Hymenoptera	gall former	Chile	2010
Leptocybe invasa	Eulophidae	Hymenoptera	gall former	Egypt	2001
Leptocybe invasa	Eulophidae	Hymenoptera	gall former	Ethiopia	2002
Leptocybe invasa	Eulophidae	Hymenoptera	gall former	Greece	2004
Leptocybe invasa	Eulophidae	Hymenoptera	gall former	Iran	2005
Leptocybe invasa	Eulophidae	Hymenoptera	gall former	Iraq	2010
Leptocybe invasa	Eulophidae	Hymenoptera	gall former	Italy	2000
Leptocybe invasa	Eulophidae	Hymenoptera	gall former	Jordan	2001
Leptocybe invasa	Eulophidae	Hymenoptera	gall former	Laos	2008
Leptocybe invasa	Eulophidae	Hymenoptera	gall former	Lebanon	2014
Leptocybe invasa	Eulophidae	Hymenoptera	gall former	Malawi	2008
Leptocybe invasa	Eulophidae	Hymenoptera	gall former	Malaysia	2012
Leptocybe invasa	Eulophidae	Hymenoptera	gall former	Malta	2006
Leptocybe invasa	Eulophidae	Hymenoptera	gall former	Sri Lanka	2010
Leptocybe invasa	Eulophidae	Hymenoptera	gall former	Thailand	2004
Leptocybe invasa	Eulophidae	Hymenoptera	gall former	Tunisia	2004
Leptocybe invasa	Eulophidae	Hymenoptera	gall former	UK	2006
Leptocybe invasa	Eulophidae	Hymenoptera	gall former	Zimbabwe	2007
Leptocybe invasa	Eulophidae	Hymenoptera	gall former	Uganda	2002
Leptocybe invasa	Eulophidae	Hymenoptera	gall former	Kenya	2002
Leptocybe invasa	Eulophidae	Hymenoptera	gall former	USA	2008
Leptocybe invasa	Eulophidae	Hymenoptera	gall former	Tanzania	2005
Leptocybe invasa	Eulophidae	Hymenoptera	gall former	Vietnam	2002
Leptocybe invasa	Eulophidae	Hymenoptera	gall former	India	2001
Leptocybe invasa	Eulophidae	Hymenoptera	gall former	China	2007
Leptocybe invasa	Eulophidae	Hymenoptera	gall former	Taiwan	2010
Megastigmus eucalypti	Torymidae	Hymenoptera	gall former	Europe/Mediterranean	2000
Moona spermophaga	Eulophidae	Hymenoptera	gall former	Argentina	2000
Moona spermophaga	Eulophidae	Hymenoptera	gall former	South Africa	2008
Nambouria xanthops	Pteromalidae	Hymenoptera	gall former	New Zealand	1999
Ocrosopsis subfasciata	Chrysomelidae	Coleoptera	leaf chewer	New Zealand	1980
Ophelimus eucalypti (Maidenaria)	Eulophidae	Hymenoptera	gall former	New Zealand	1921
Ophelimus eucalypti (Transversaria)	Eulophidae	Hymenoptera	gall former	New Zealand	1987
Ophelimus maskelli	Eulophidae	Hymenoptera	gall former	Turkey	2004
Ophelimus maskelli	Eulophidae	Hymenoptera	gall former	Portugal	2006
Ophelimus maskelli	Eulophidae	Hymenoptera	gall former	USA	2014
Ophelimus maskelli	Eulophidae	Hymenoptera	gall former	Italy	2000
Ophelimus maskelli	Eulophidae	Hymenoptera	gall former	Algeria	2010
Ophelimus maskelli	Eulophidae	Hymenoptera	gall former	Argentina	2013
Ophelimus maskelli	Eulophidae	Hymenoptera	gall former	France	2005
Ophelimus maskelli	Eulophidae	Hymenoptera	gall former	Greece	2002
Ophelimus maskelli	Eulophidae	Hymenoptera	gall former	Indonesia	2015
Ophelimus maskelli	Eulophidae	Hymenoptera	gall former	Morocco	2011
Ophelimus maskelli	Eulophidae	Hymenoptera	gall former	South Africa	2015
Ophelimus maskelli	Eulophidae	Hymenoptera	gall former	Spain	2003
Ophelimus maskelli	Eulophidae	Hymenoptera	gall former	Syria	2014
Ophelimus maskelli	Eulophidae	Hymenoptera	gall former	Tunisia	2006
Ophelimus maskelli	Eulophidae	Hymenoptera	gall former	UK	2006
Ophelimus maskelli	Eulophidae	Hymenoptera	gall former	Vietnam	2015
Ophelimus maskelli	Eulophidae	Hymenoptera	gall former	Malta	P2012
Ophelimus maskelli	Eulophidae	Hymenoptera	gall former	Israel	2003
Opodiphthera eucalypti	Saturniidae	Lepidoptera	leaf chewer	New Zealand	1915
Paropsis charybdis	Chrysomelidae	Coleoptera	leaf chewer	New Zealand	1916
Paropsisterna selmani	Chrysomelidae	Coleoptera	leaf chewer	Ireland	2007
Phoracantha recurva	Cerambycidae	Coleoptera	wood borer	Argentina	1970
Phoracantha recurva	Cerambycidae	Coleoptera	wood borer	Brazil	2001
Phoracantha recurva	Cerambycidae	Coleoptera	wood borer	Cyprus	2014
Phoracantha recurva	Cerambycidae	Coleoptera	wood borer	France	2008
Phoracantha recurva	Cerambycidae	Coleoptera	wood borer	Greece	2009
Phoracantha recurva	Cerambycidae	Coleoptera	wood borer	Israel	2008
Phoracantha recurva	Cerambycidae	Coleoptera	wood borer	Libya	2005
Phoracantha recurva	Cerambycidae	Coleoptera	wood borer	Malawi	2009
Phoracantha recurva	Cerambycidae	Coleoptera	wood borer	Malta	2013
Phoracantha recurva	Cerambycidae	Coleoptera	wood borer	Morocco	2005
Phoracantha recurva	Cerambycidae	Coleoptera	wood borer	Portugal	2001
Phoracantha recurva	Cerambycidae	Coleoptera	wood borer	South Africa	1949
Phoracantha recurva	Cerambycidae	Coleoptera	wood borer	Spain	2000
Phoracantha recurva	Cerambycidae	Coleoptera	wood borer	Tunisia	1999
Phoracantha recurva	Cerambycidae	Coleoptera	wood borer	Turkey	2004
Phoracantha recurva	Cerambycidae	Coleoptera	wood borer	Uruguay	1998
Phoracantha recurva	Cerambycidae	Coleoptera	wood borer	Zambia	1977
Phoracantha recurva	Cerambycidae	Coleoptera	wood borer	USA	1995
Phoracantha recurva	Cerambycidae	Coleoptera	wood borer	Chile	1997
Phoracantha recurva	Cerambycidae	Coleoptera	wood borer	Italy	1995
Phoracantha semipunctata	Cerambycidae	Coleoptera	wood borer	Turkey	1957
Phoracantha semipunctata	Cerambycidae	Coleoptera	wood borer	Argentina	early 1900s
Phoracantha semipunctata	Cerambycidae	Coleoptera	wood borer	Peru	P1967
Phoracantha semipunctata	Cerambycidae	Coleoptera	wood borer	Algeria	1972
Phoracantha semipunctata	Cerambycidae	Coleoptera	wood borer	Egypt	1950
Phoracantha semipunctata	Cerambycidae	Coleoptera	wood borer	Israel	1945
Phoracantha semipunctata	Cerambycidae	Coleoptera	wood borer	Morocco	1962
Phoracantha semipunctata	Cerambycidae	Coleoptera	wood borer	South Africa	1906
Phoracantha semipunctata	Cerambycidae	Coleoptera	wood borer	Spain	1981
Phoracantha semipunctata	Cerambycidae	Coleoptera	wood borer	Tunisia	1999
Phoracantha semipunctata	Cerambycidae	Coleoptera	wood borer	Uruguay	1996
Phoracantha semipunctata	Cerambycidae	Coleoptera	wood borer	Zambia	1968
Phoracantha semipunctata	Cerambycidae	Coleoptera	wood borer	Zimbabwe	1954
Phoracantha semipunctata	Cerambycidae	Coleoptera	wood borer	USA	1984
Phoracantha semipunctata	Cerambycidae	Coleoptera	wood borer	Tunisia	1963
Phoracantha semipunctata	Cerambycidae	Coleoptera	wood borer	Chile	1973
Phoracantha semipunctata	Cerambycidae	Coleoptera	wood borer	Italy	1969
Phoracantha semipunctata	Cerambycidae	Coleoptera	wood borer	Libya	P1999
Phoracantha semipunctata	Cerambycidae	Coleoptera	wood borer	Portugal	1980
Phoracantha semipunctata	Cerambycidae	Coleoptera	wood borer	New Zealand	1873
Phylacteophaga froggatti	Pergidae	Hymenoptera	leaf chewer	New Zealand	1985
Platyobria biemani	Psyllidae	Hemiptera	sap sucker	Greece	P2014
Porotermes adamsoni	Termopsidae	Isoptera	termites	New Zealand	2007
Quadrastichodella nova	Eulophidae	Hymenoptera	gall former	Turkey	2008
Quadrastichodella nova	Eulophidae	Hymenoptera	gall former	Italy	pre-2005
Quadrastichodella nova	Eulophidae	Hymenoptera	gall former	Greece	1979
Quadrastichodella nova	Eulophidae	Hymenoptera	gall former	Israel	1977
Quadrastichodella nova	Eulophidae	Hymenoptera	gall former	South Africa	1977
Quadrastichodella nova	Eulophidae	Hymenoptera	gall former	Spain	1977
Quadrastichodella nova	Eulophidae	Hymenoptera	gall former	Argentina	1957
Quadrastichodella nova	Eulophidae	Hymenoptera	gall former	USA	1957
Quadrastichodella nova	Eulophidae	Hymenoptera	gall former	New Zealand	1959
Selitrichodes globulus	Eulophidae	Hymenoptera	gall former	USA	2008
Strepsicrates infensa	Tortricidae	Lepidoptera	leaf chewer	New Zealand	1924
Strepsicrates macropetana	Tortricidae	Lepidoptera	leaf chewer	New Zealand	1923
Thaumastocoris peregrinus	Thaumastocoridae	Hemiptera	sap sucker	Portugal	2012
Thaumastocoris peregrinus	Thaumastocoridae	Hemiptera	sap sucker	Chile	2009
Thaumastocoris peregrinus	Thaumastocoridae	Hemiptera	sap sucker	Italy	2011
Thaumastocoris peregrinus	Thaumastocoridae	Hemiptera	sap sucker	Uruguay	2008
Thaumastocoris peregrinus	Thaumastocoridae	Hemiptera	sap sucker	Tanzania	P2015
Thaumastocoris peregrinus	Thaumastocoridae	Hemiptera	sap sucker	Uganda	P2015
Thaumastocoris peregrinus	Thaumastocoridae	Hemiptera	sap sucker	Kenya	2009
Thaumastocoris peregrinus	Thaumastocoridae	Hemiptera	sap sucker	Malawi	2008
Thaumastocoris peregrinus	Thaumastocoridae	Hemiptera	sap sucker	Paraguay	P2012
Thaumastocoris peregrinus	Thaumastocoridae	Hemiptera	sap sucker	Zimbabwe	2007
Thaumastocoris peregrinus	Thaumastocoridae	Hemiptera	sap sucker	Argentina	2005
Thaumastocoris peregrinus	Thaumastocoridae	Hemiptera	sap sucker	South Africa	2003
Thaumastocoris peregrinus	Thaumastocoridae	Hemiptera	sap sucker	New Zealand	2012
Thaumastocoris peregrinus	Thaumastocoridae	Hemiptera	sap sucker	Brazil	2008
Trachymela catenata	Chrysomelidae	Coleoptera	leaf chewer	New Zealand	1992
Trachymela sloanei	Chrysomelidae	Coleoptera	leaf chewer	USA	1998
Trachymela sloanei	Chrysomelidae	Coleoptera	leaf chewer	South Africa	1976
Trachymela sloanei	Chrysomelidae	Coleoptera	leaf chewer	New Zealand	1976
Trachymela tincticollis	Chrysomelidae	Coleoptera	leaf chewer	South Africa	1982
Uraba lugens	Nolidae	Lepidoptera	leaf chewer	New Zealand	1997
